# Supplementary material for: Layer-by-layer reduced graphene oxide (rGO)/gold nanosheets (AuNSs) hybrid films: significantly enhanced photothermal transition effect compared with rGO or AuNSs films
Source: Royal Society of Chemistry journal article supplement (doi:10.1039/c5ra07647a), 2015-01-01
Supplement: c5ra07647a1.pdf [file c5ra07647a1.pdf]

Supporting information

Layer-by-layer reduced graphene oxide (rGO)/Gold nanosheets (AuNSs) hybrid  
films: significantly enhanced photothermal transition effect compared with  
rGO or AuNSs films

*Kun Nie, Qi An\*, Shengyang Tao\*, Zepeng Zhang, Xinglong Luan, Qian Zhang, Yihe Zhang\**

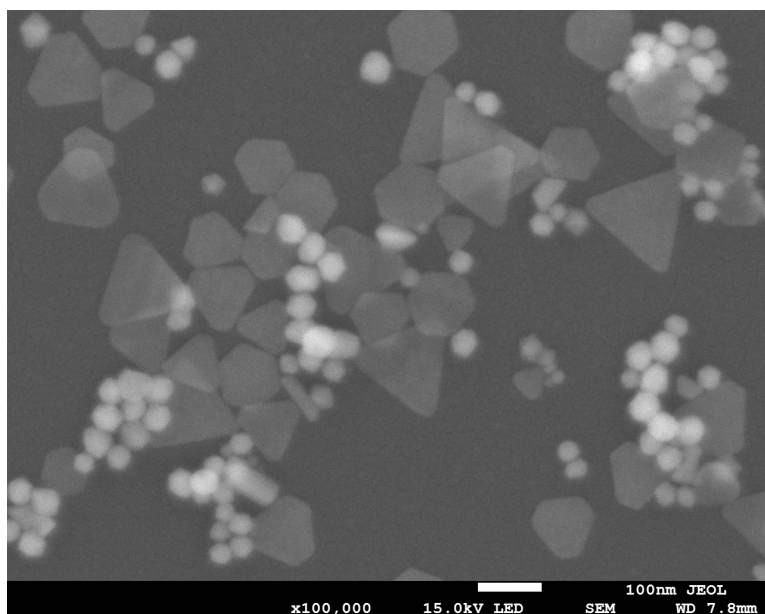

Figure S 1. SEM images of AuNSs.

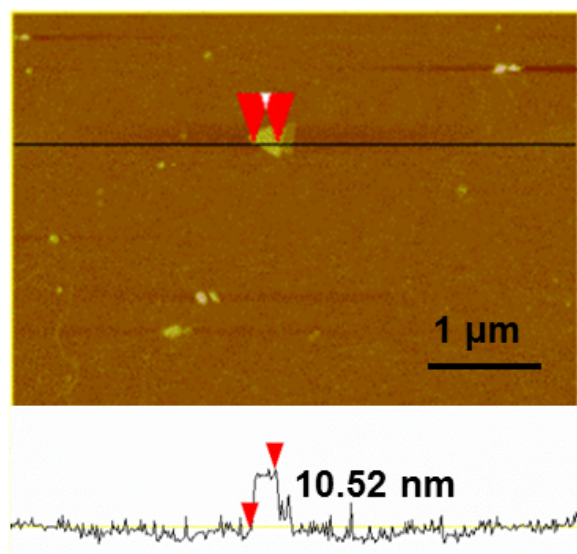

Figure S 2. AFM images with height profile of AuNSs, indicating the thickness of the gold sheet is around 10 nm. The scan size is  $5\text{ }\mu\text{m} \times 5\text{ }\mu\text{m}$  (Only partial image is displayed for the reason of clarity).

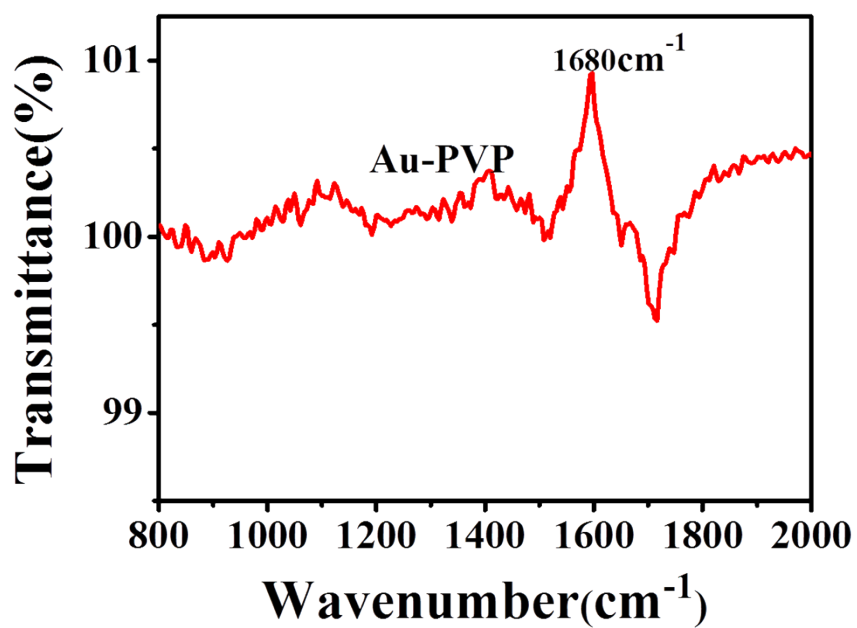

Figure S 3. ATR-IR spectra of Au nanosheets. The vibrational peak at  $1680\text{ cm}^{-1}$  is the characteristic peak of PVP polymer.

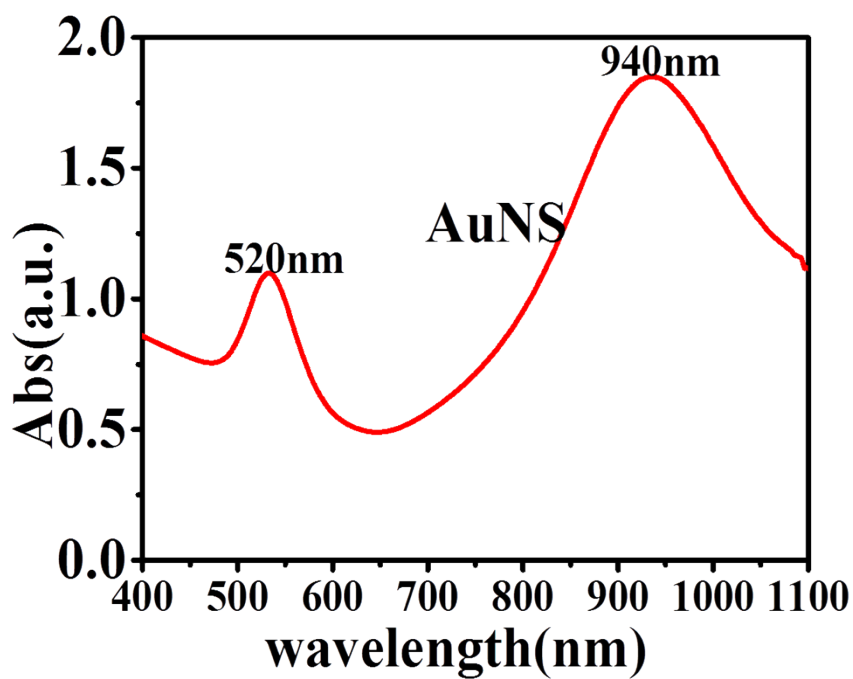

Figure S 4. UV-vis spectra of AuNSs, absorbing lights in both visible and near infrared regions.

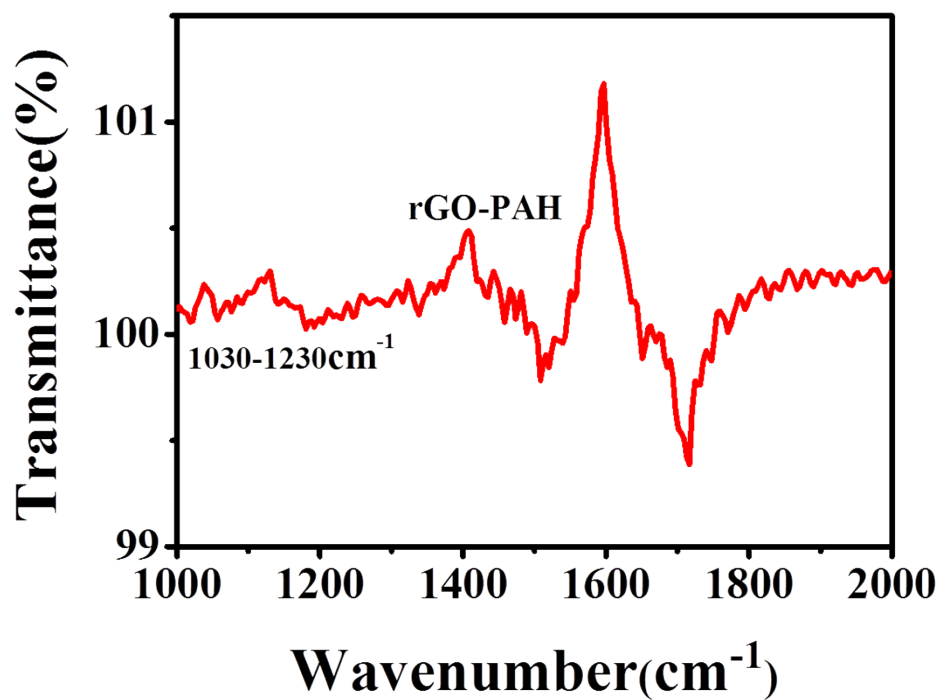

Figure S 5. ATR-IR spectra of rGO(-PAH). The vibrational absorbance at 1030-1230  $\text{cm}^{-1}$  is the characteristic peak of PAH polymer.

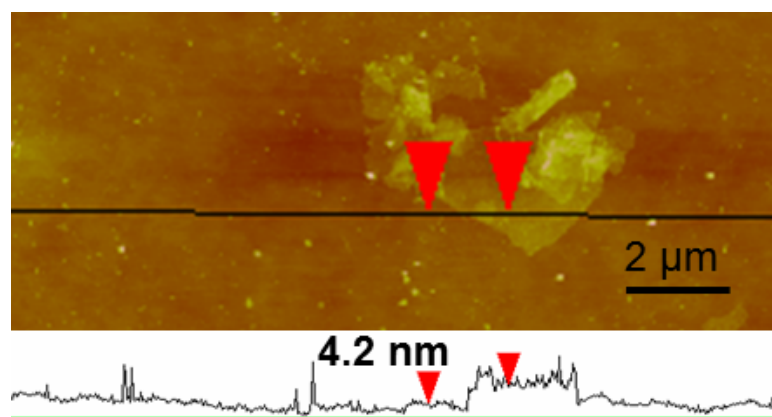

Figure S 6. AFM image with height profile of rGO (surface modified by PAH).

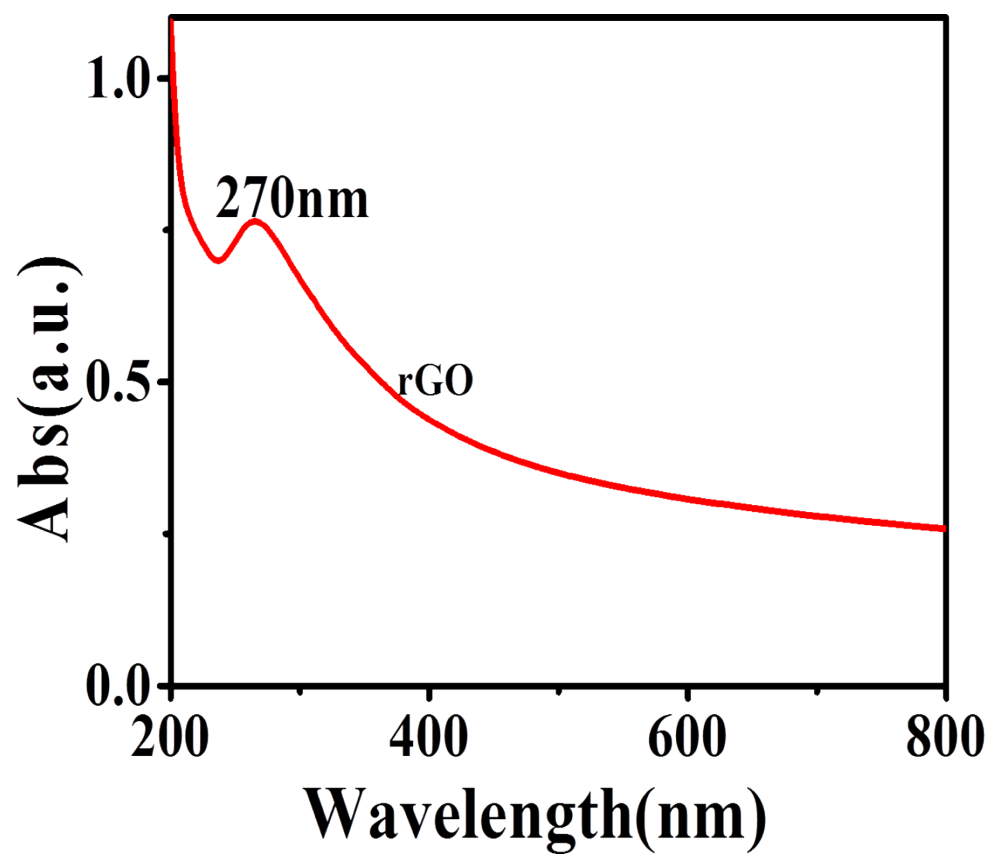

Figure S 7. UV-vis spectra of rGO, showing characteristic absorbance around 270 nm, and absorbing light throughout the UV-vis-NIR regions.

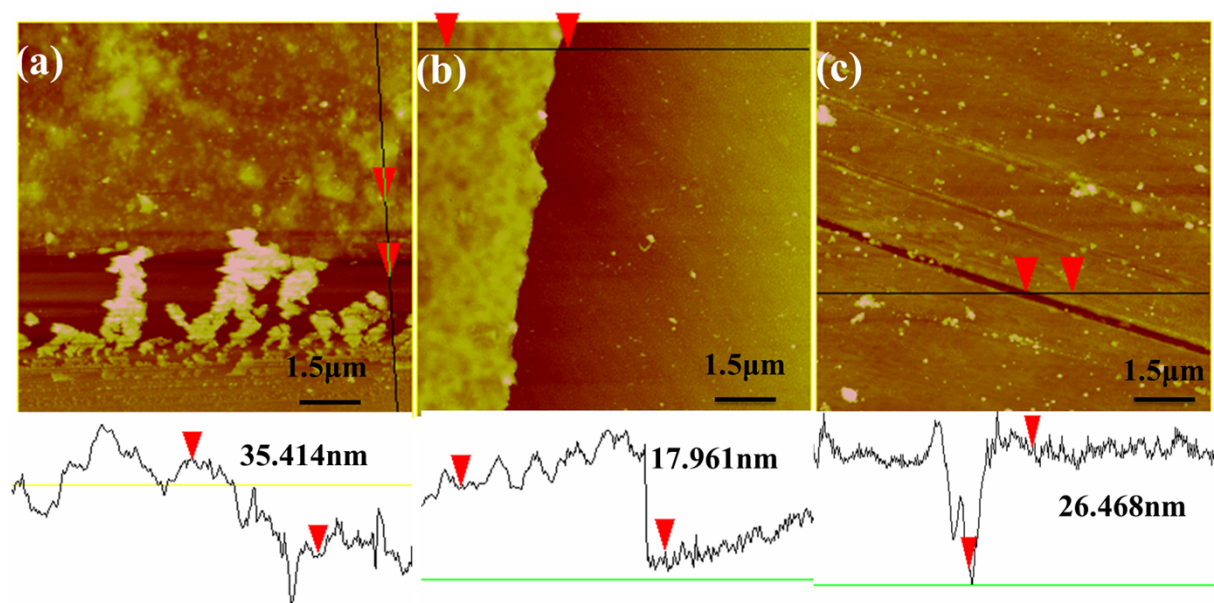

Figure S 8. AFM images and corresponding height profile at defect lines of (a) (rGO/AuNS)<sub>5</sub>, (b) (RGO-PAH/PAA)<sub>5</sub> and (c) (AuNS/PAH)<sub>5</sub> multilayers. The defect lines was generated by scratching the surface using a pair of tweezer.

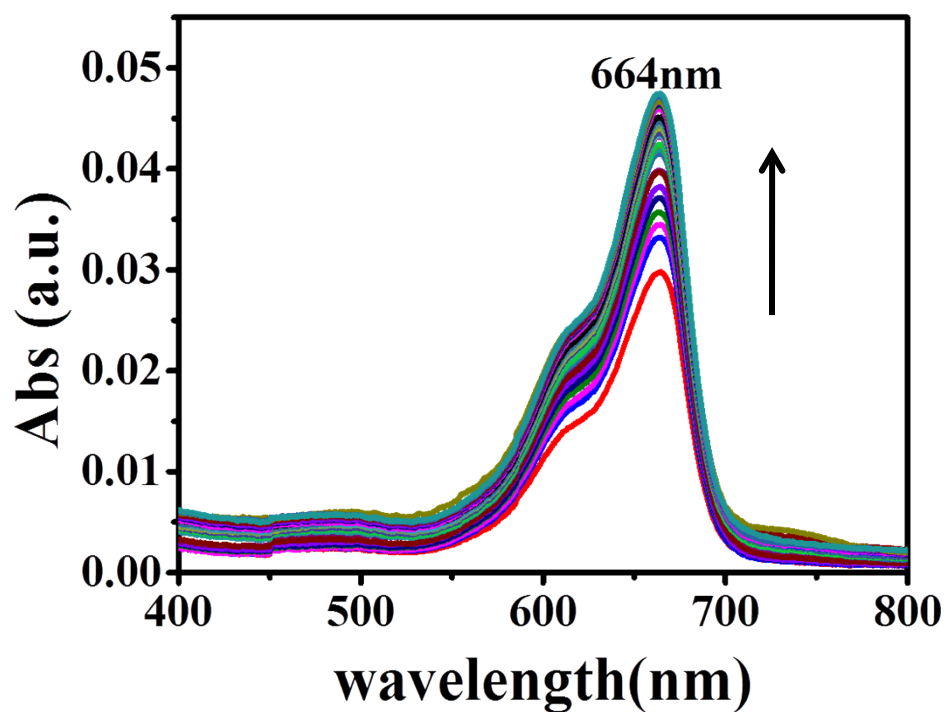

Figure S 9. The UV-vis spectra of MB during the release process.
